# Supplementary material for: Pain and disability after first-time spinal fusion for lumbar degenerative disorders: a systematic review and meta-analysis
Source: Springer Nature journal article supplement (doi:10.1007/s00586-018-5680-3), 2018-07-11
Supplement: MOESM3 [file 15945194]

Appendix Table 2; Overview of methodological quality assessment

|                          | <b>Study participation [32]</b>                                                                                                                                    | <b>Defined sample [33]</b>                                                        | <b>Study attrition / complete follow up [32]</b>                                               | <b>Outcome measurement [32]</b>                                                  | <b>Study confounding [32]</b>                                        | <b>Statistical analysis and reporting [32]</b>                                     | <b>Provision of data [32]</b>                                             | <b>Blinded outcome [33]</b>                                                           | <b>Overall statement of risk of bias</b> |
|--------------------------|--------------------------------------------------------------------------------------------------------------------------------------------------------------------|-----------------------------------------------------------------------------------|------------------------------------------------------------------------------------------------|----------------------------------------------------------------------------------|----------------------------------------------------------------------|------------------------------------------------------------------------------------|---------------------------------------------------------------------------|---------------------------------------------------------------------------------------|------------------------------------------|
|                          | <b>Representative sample [33]</b>                                                                                                                                  |                                                                                   |                                                                                                |                                                                                  |                                                                      |                                                                                    |                                                                           |                                                                                       |                                          |
|                          | <i>Data related to outcome may be different for participants and eligible non-participants / Participants selected by random selection or as consecutive cases</i> | <i>Description of source of participants and inclusion and exclusion criteria</i> | <i>Data related to outcome may be different for completing and non-completing participants</i> | <i>Measurement of the outcome may be different related to the baseline level</i> | <i>Outcome may be distorted by another factor related to outcome</i> | <i>Reported results may be spurious or biased related to analysis or reporting</i> | <i>Studies must provide raw data, percentages, or continuous outcomes</i> | <i>Assessor blinded and unaware of other measures at time of outcome was measured</i> | <i>Low, unclear or high rating</i>       |
| Barrey et al. [43]       | Low ROB                                                                                                                                                            | Low ROB                                                                           | Moderate ROB                                                                                   | Low ROB                                                                          | Moderate ROB                                                         | Moderate ROB                                                                       | Low ROB                                                                   | Low ROB                                                                               | <b>Unclear ROB</b>                       |
| Boissiere et al. [44]    | Low ROB                                                                                                                                                            | Low ROB                                                                           | Moderate ROB                                                                                   | Low ROB                                                                          | Moderate ROB                                                         | Moderate ROB                                                                       | Low ROB                                                                   | Low ROB                                                                               | <b>Unclear ROB</b>                       |
| Cobo Soriano et al. [45] | Low ROB                                                                                                                                                            | Moderate ROB                                                                      | Low ROB                                                                                        | Low ROB                                                                          | Low ROB                                                              | Low ROB                                                                            | Low ROB                                                                   | Moderate ROB                                                                          | <b>Unclear ROB</b>                       |

|                           |              |              |              |              |              |              |              |              |                    |
|---------------------------|--------------|--------------|--------------|--------------|--------------|--------------|--------------|--------------|--------------------|
| Cuéllar et al. [63]       | Moderate ROB | Low ROB      | Low ROB      | Low ROB      | Moderate ROB | Moderate ROB | Low ROB      | Moderate ROB | <b>Unclear ROB</b> |
| Debnath et al. [64]       | Moderate ROB | High ROB     | Moderate ROB | Low ROB      | Moderate ROB | Low ROB      | Low ROB      | Moderate ROB | <b>High ROB</b>    |
| Franke et al. [65]        | Low ROB      | Low ROB      | Low ROB      | Low ROB      | Moderate ROB | Low ROB      | Low ROB      | Moderate ROB | <b>Unclear ROB</b> |
| Ghogawala et al. [46]     | Moderate ROB | Low ROB      | Moderate ROB | Low ROB      | Low ROB      | Low ROB      | Low ROB      | Low ROB      | <b>Unclear ROB</b> |
| Godil et al. [47]         | Low ROB      | Low ROB      | Moderate ROB | Moderate ROB | Moderate ROB | Low ROB      | Low ROB      | Low ROB      | <b>Unclear ROB</b> |
| Hagenmaier et al. [48]    | Moderate ROB | Low ROB      | High ROB     | Low ROB      | Moderate ROB | Low ROB      | Low ROB      | Moderate ROB | <b>High ROB</b>    |
| Inage et al. [49]         | High ROB     | Moderate ROB | Moderate ROB | Moderate ROB | Moderate ROB | Low ROB      | Low ROB      | Moderate ROB | <b>High ROB</b>    |
| Kanter et al. [66]        | Moderate ROB | Low ROB      | Low ROB      | Low ROB      | Moderate ROB | Low ROB      | Low ROB      | Low ROB      | <b>Unclear ROB</b> |
| Kleeman et al. [50]       | Low ROB      | Low ROB      | Low ROB      | Moderate ROB | Low ROB      | Low ROB      | Low ROB      | Moderate ROB | <b>Unclear ROB</b> |
| Kok, Donk, et al. [51]    | Low ROB      | Moderate ROB | Low ROB      | Low ROB      | Moderate ROB | High ROB     | Moderate ROB | Moderate ROB | <b>High ROB</b>    |
| Kok, Grevitt, et al. [52] | Low ROB      | Moderate ROB | Low ROB      | Low ROB      | Moderate ROB | Moderate ROB | Moderate ROB | Moderate ROB | <b>Unclear ROB</b> |
| Lara-Almunia et al. [53]  | Moderate ROB | Moderate ROB | Low ROB      | Moderate ROB | Moderate ROB | Moderate ROB | Low ROB      | Moderate ROB | <b>Unclear ROB</b> |

|                           |              |              |              |              |              |              |              |              |                    |
|---------------------------|--------------|--------------|--------------|--------------|--------------|--------------|--------------|--------------|--------------------|
| Lee et al. [54]           | Low ROB      | Moderate ROB | Moderate ROB | Low ROB      | Moderate ROB | Low ROB      | Low ROB      | Moderate ROB | <b>Unclear ROB</b> |
| Mao et al. [55]           | Moderate ROB | Moderate ROB | High ROB     | Low ROB      | Moderate ROB | Low ROB      | Low ROB      | Low ROB      | <b>High ROB</b>    |
| Pavlov et al. [56]        | Low ROB      | Low ROB      | High ROB     | Low ROB      | Moderate ROB | Low ROB      | Moderate ROB | Moderate ROB | <b>High ROB</b>    |
| Pereira et al. [57]       | Low ROB      | Low ROB      | Low ROB      | Moderate ROB | Low ROB      | Moderate ROB | Low ROB      | Moderate ROB | <b>Unclear ROB</b> |
| Pimenta et al. [58]       | Moderate ROB | Moderate ROB | Low ROB      | Low ROB      | Moderate ROB | Low ROB      | Low ROB      | Moderate ROB | <b>Unclear ROB</b> |
| Rhee et al. [67]          | Low ROB      | Moderate ROB | Low ROB      | Low ROB      | Moderate ROB | Low ROB      | Low ROB      | Moderate ROB | <b>Unclear ROB</b> |
| Tobler and Ferrara [59]   | Moderate ROB | Moderate ROB | High ROB     | Low ROB      | Moderate ROB | Low ROB      | Moderate ROB | Moderate ROB | <b>High ROB</b>    |
| Trouiller et al. [60]     | Moderate ROB | Moderate ROB | Low ROB      | High ROB     | Moderate ROB | Moderate ROB | Moderate ROB | Low ROB      | <b>High ROB</b>    |
| Tsahtsarlis and Wood [61] | Low ROB      | Moderate ROB | Low ROB      | Low ROB      | Moderate ROB | Low ROB      | Moderate ROB | Moderate ROB | <b>Unclear ROB</b> |
| Xu et al. [62]            | Low ROB      | Low ROB      | Low ROB      | Low ROB      | Moderate ROB | Moderate ROB | Moderate ROB | Moderate ROB | <b>Unclear ROB</b> |

*Abbreviation: ROB: risk of bias*

**Article name:** Pain and disability after first-time spinal fusion for lumbar degenerative disorders: a systematic review and meta-analysis

**Journal name:** European Spine Journal

**Author names:** Niek Koenders, Alison Rushton, Martin L. Verra, Paul C. Willems, Thomas J. Hoogeboom, J. Bart Staal.

**Corresponding author:** Niek Koenders, [niek.koenders@radboudumc.nl](mailto:niek.koenders@radboudumc.nl)
