# Supplementary material for: Pain and disability after first-time spinal fusion for lumbar degenerative disorders: a systematic review and meta-analysis
Source: Springer Nature journal article supplement (doi:10.1007/s00586-018-5680-3), 2018-07-11
Supplement: MOESM4 [file 15945194]

Appendix Table 3; Overview of location bias items

| Study<br>(primary author) | Indexing of study       | Journal                 | Impact<br>factor | Impact<br>factor rank | Change score disability<br>(baseline –<br>one-year follow-up) |      | Change<br>score rank |
|---------------------------|-------------------------|-------------------------|------------------|-----------------------|---------------------------------------------------------------|------|----------------------|
|                           |                         |                         |                  |                       |                                                               |      |                      |
| Tobler and Ferrara [59]   | Medline                 | J Bone Joint Surg Am    | 5.163            | 1                     | 49.0 – 33.0                                                   | 16.0 | 20                   |
| Pereira et al. [57]       | Medline, Embase         | PLoS One                | 3.057            | 2                     | 45.5 - 34.5 ‡                                                 | 11.0 | 23                   |
| Godil et al. [47]         | Medline, Embase         | The Spine Journal       | 2.660            | 3                     | 62.8 – 22.6 †                                                 | 40.2 | 3                    |
| Pavlov et al. [56]        | Medline, Embase         | SPINE                   | 2.439            | 6.5                   | 46.6 – 2.5 *                                                  | 42.1 | 2                    |
| Lee et al. [54]           | Medline                 | SPINE                   | 2.439            | 6.5                   | 24.5 – 10.4                                                   | 14.1 | 22                   |
| Inage et al. [49]         | Medline                 | SPINE                   | 2.439            | 6.5                   | 40.3 – 24.7 *†                                                | 15.6 | 21                   |
| Cuéllar et al. [63]       | Medline, Embase         | SPINE                   | 2.439            | 6.5                   | 37.0 – 14.0                                                   | 23.0 | 15.5                 |
| Hagenmaier et al. [48]    | Medline, CINAHL         | SPINE                   | 2.439            | 6.5                   | 36.0 – 9.4                                                    | 26.6 | 10                   |
| Kleeman et al. [50]       | Medline, CINAHL, Embase | SPINE                   | 2.439            | 6.5                   | 47.0 – 11.0                                                   | 36.0 | 6                    |
| Mao et al. [55]           | Medline                 | Int Orthop              | 2.387            | 10                    | 51.0 – 7.0                                                    | 44.0 | 1                    |
| Barrey et al. [43]        | Medline, Embase         | Eur Spine Journal       | 2.132            | 12                    | 48.0 – 24.0                                                   | 24.0 | 13                   |
| Cobo Soriano et al. [45]  | Medline, Embase         | Eur Spine Journal       | 2.132            | 12                    | 45.1 – 23.1 *                                                 | 32.0 | 7                    |
| Rhee et al. [67]          | Medline, Embase         | Eur Spine Journal       | 2.132            | 12                    | n.a.                                                          | n.a. | n.a.                 |
| Xu et al. [62]            | Medline                 | J Neurosurg Spine       | 2.126            | 14.5                  | 32.3 – 13.1 †                                                 | 19.2 | 19                   |
| Ghogawala et al. [46]     | Medline, Embase         | J Neurosurg Spine       | 2.126            | 14.5                  | 46.8 – 22.4                                                   | 24.4 | 12                   |
| Franke et al. [65]        | Medline                 | Cureus                  | 1.730            | 16                    | 45.3 – 22.4                                                   | 22.9 | 17.5                 |
| Kanter et al. [66]        | Medline, Embase         | J Clin Neurosci         | 1.610            | 17.5                  | 50.9 – 24.1                                                   | 26.8 | 8.5                  |
| Tsahtsarlis and Wood [61] | Medline, Embase         | J Clin Neurosci         | 1.610            | 17.5                  | 46.9 – 20.1                                                   | 26.8 | 8.5                  |
| Kok, Grevitt et al. [52]  | Medline                 | Open Orthop Journal     | 1.470            | 19                    | 40.9 – 17.7 †                                                 | 23.2 | 14                   |
| Boissiere et al. [44]     | Medline, Embase         | Orthop. &<br>Traumatol. | 1.393            | 20                    | 46.5 – 23.6                                                   | 22.9 | 17.5                 |
| Kok, Donk et al. [51]     | Medline                 | Adv Orthop              | 1.127            | 21                    | 38.2 – 12.3                                                   | 25.9 | 11                   |
| Trouillier et al. [60]    | Medline, Embase         | Acta Orthop Belg        | 0.837            | 22                    | 58.0 – 26.0                                                   | 23.0 | 15.5                 |
| Pimenta et al. [58]       | Medline, Embase         | SAS Journal             | 0.800            | 23                    | 55.5 – 19.3                                                   | 36.2 | 5                    |
| Debnath et al. [64]       | Medline                 | Asian Spine Journal     | 0.740            | 24                    | 48.0 – 10.0                                                   | 38.0 | 4                    |
| Lara-Almunia et al. [53]  | Medline                 | Int J Spine Surg        | 0.430            | 25                    | n.a.                                                          | n.a. | n.a.                 |

\* mean of subgroups, † two-year follow-up, ‡ 4-week follow-up, § 6-month follow-up

**Article name:** Pain and disability after first-time spinal fusion for lumbar degenerative disorders: a systematic review and meta-analysis

**Journal name:** European Spine Journal

**Author names:** Niek Koenders, Alison Rushton, Martin L. Verra, Paul C. Willems, Thomas J. Hoogeboom, J. Bart Staal.

**Corresponding author:** Niek Koenders, [niek.koenders@radboudumc.nl](mailto:niek.koenders@radboudumc.nl)
