# Supplementary material for: Pain and disability after first-time spinal fusion for lumbar degenerative disorders: a systematic review and meta-analysis
Source: Springer Nature journal article supplement (doi:10.1007/s00586-018-5680-3), 2018-07-11
Supplement: MOESM5 [file 15945194]

Appendix 4; Details of pain and disability outcomes

**Pain following first time lumbar spinal fusion for degenerative disorders, measured with visual analogue scale for both back and leg pain (0 no pain, 100 maximum pain)**

Meta-analysis

| Follow-up interval | Variance weighted pooled mean | Upper bound 95% confidence interval | Number of studies | Number of participants |
|--------------------|-------------------------------|-------------------------------------|-------------------|------------------------|
| Preoperative       | 79                            | 88                                  | 4                 | 206                    |
| 3 months           | 24                            | 35                                  | 2                 | 122                    |
| 6 months           | 18                            | 26                                  | 3                 | 143                    |

Sensitivity analysis

| Follow-up interval | N weighted pooled mean | Number of studies | Number of participants |
|--------------------|------------------------|-------------------|------------------------|
| Preoperative       | 71.9                   | 6                 | 308                    |
| 1 month            | 21                     | 2                 | 147                    |
| 6 weeks            | 47                     | 1                 | 24                     |
| 3 months           | 19.4                   | 4                 | 220                    |
| 6 months           | 14.6                   | 5                 | 244                    |
| 12 months          | 14.2                   | 6                 | 302                    |
| 24 months          | 5.9                    | 2                 | 150                    |
| 36 months          | 7.0                    | 1                 | 98                     |
| 48 months          | 32.3                   | 1                 | 52                     |

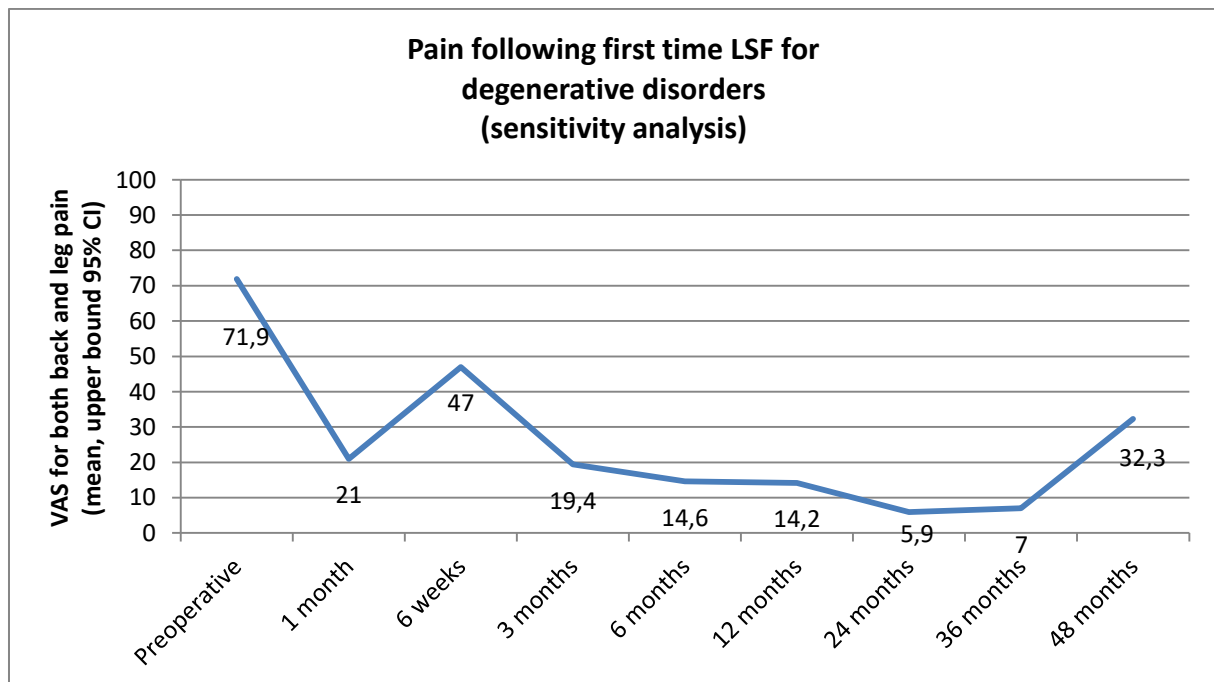

**Back pain following first time lumbar spinal fusion for degenerative disorders, measured with back pain visual analogue scale (0 no pain, 100 maximum pain)**

Meta-analysis

| Follow-up interval | Variance weighted pooled mean | Upper bound 95% confidence interval | Number of studies | Number of participants |
|--------------------|-------------------------------|-------------------------------------|-------------------|------------------------|
| Preoperative       | 64                            | 71                                  | 9                 | 908                    |
| 6 weeks            | 30                            | 42                                  | 2                 | 153                    |
| 3 months           | 21                            | 29                                  | 3                 | 346                    |
| 6 months           | 25                            | 33                                  | 4                 | 416                    |
| 12 months          | 22                            | 27                                  | 6                 | 475                    |
| 24 months          | 20                            | 24                                  | 4                 | 291                    |

Sensitivity analysis

| Follow-up interval | N weighted pooled mean | Number of studies | Number of participants |
|--------------------|------------------------|-------------------|------------------------|
| Preoperative       | 65.4                   | 12                | 984                    |
| 1 month            | 30.1                   | 2                 | 261                    |
| 6 weeks            | 29.2                   | 2                 | 153                    |
| 3 months           | 26.7                   | 4                 | 372                    |
| 6 months           | 28.0                   | 5                 | 440                    |
| 12 months          | 31.1                   | 10                | 735                    |
| 18 months          | 18.0                   | 1                 | 83                     |
| 24 months          | 22.2                   | 6                 | 366                    |
| 42 months          | 45.0                   | 1                 | 30                     |

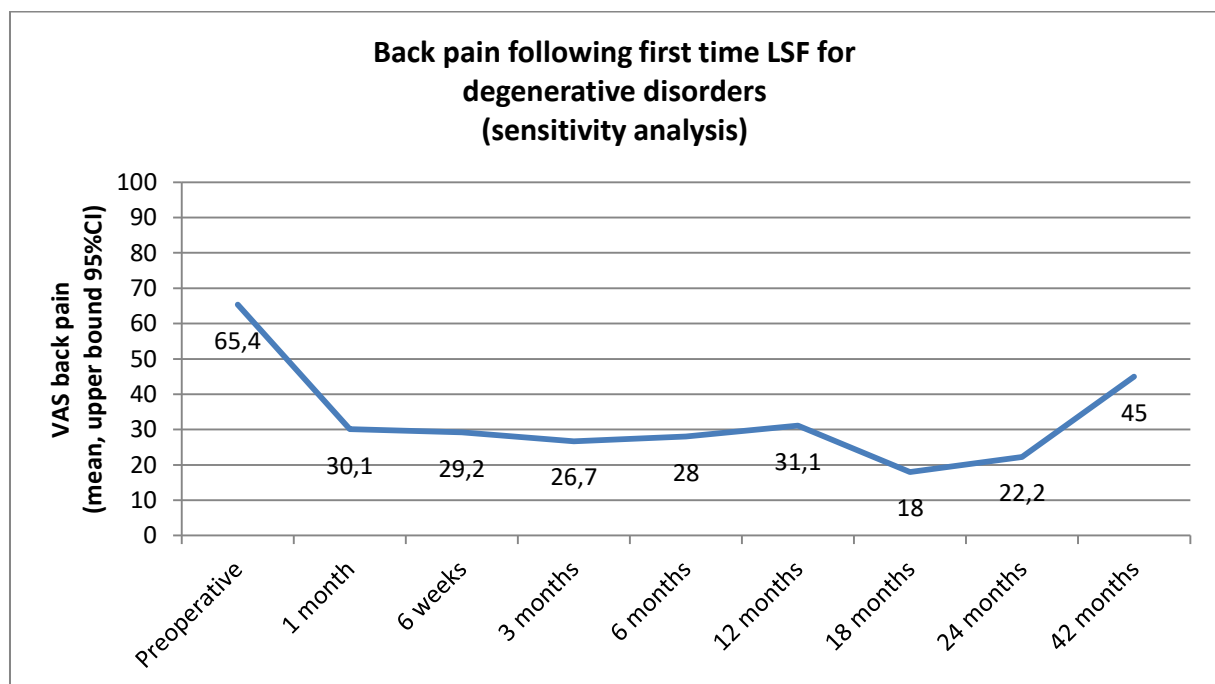

**Leg pain following first time lumbar spinal fusion for degenerative disorders, measured with leg pain visual analogue scale (0 no pain, 100 maximum pain)**

Meta-analysis

| Follow-up interval | Variance weighted pooled mean | Upper bound 95% confidence interval | Number of studies | Number of participants |
|--------------------|-------------------------------|-------------------------------------|-------------------|------------------------|
| Preoperative       | 70                            | 74                                  | 9                 | 859                    |
| 1 month            | 25                            | 28                                  | 2                 | 262                    |
| 3 months           | 11                            | 19                                  | 3                 | 346                    |
| 6 months           | 11                            | 18                                  | 3                 | 347                    |
| 12 months          | 15                            | 20                                  | 5                 | 415                    |
| 24 months          | 17                            | 23                                  | 4                 | 265                    |

Sensitivity analysis

| Follow-up interval | N weighted pooled mean | Number of studies | Number of participants |
|--------------------|------------------------|-------------------|------------------------|
| Preoperative       | 67.2                   | 12                | 955                    |
| 1 month            | 24.6                   | 2                 | 262                    |
| 6 weeks            | 11.8                   | 2                 | 103                    |
| 3 months           | 16.2                   | 4                 | 366                    |
| 6 months           | 15.5                   | 4                 | 367                    |
| 12 months          | 22.9                   | 8                 | 665                    |
| 18 months          | 7.0                    | 1                 | 83                     |
| 24 months          | 16.8                   | 5                 | 323                    |
| 42 months          | 10.0                   | 1                 | 30                     |

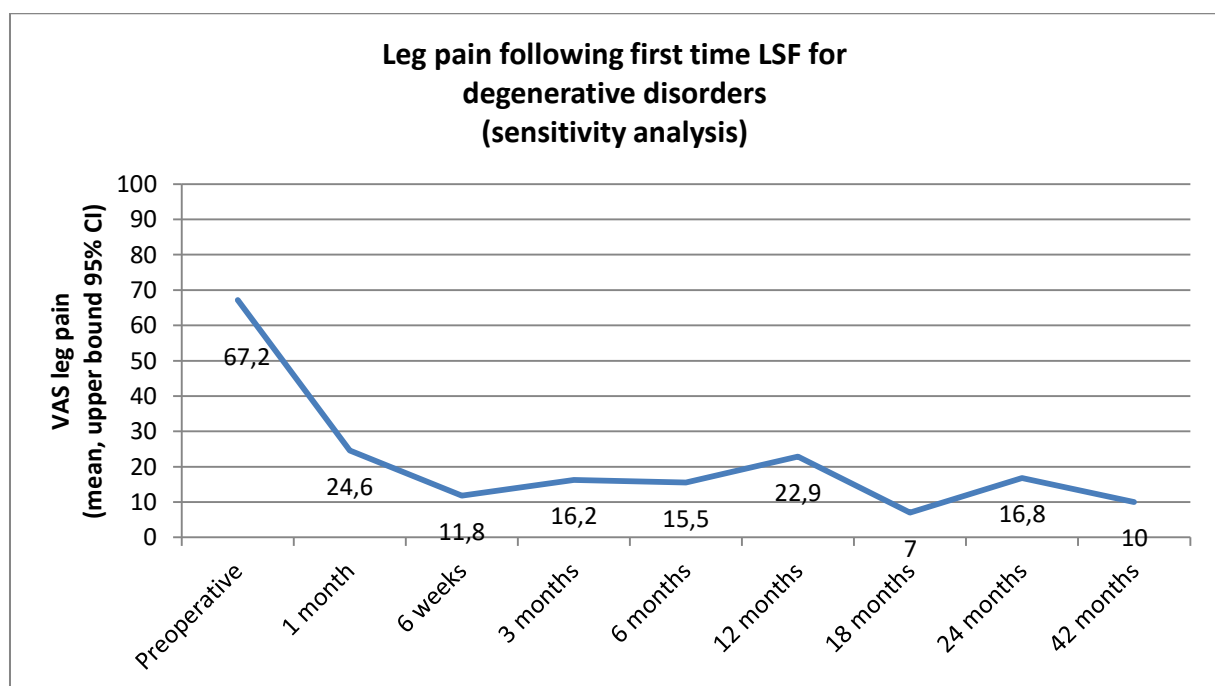

**Disability following first time lumbar spinal fusion for degenerative disorders, measured with Oswestry disability index (0 no disability, 100 maximum disability)**

Meta-analysis

| Follow-up interval | Variance weighted pooled mean | Upper bound 95% confidence interval | Number of studies | Number of participants |
|--------------------|-------------------------------|-------------------------------------|-------------------|------------------------|
| Preoperative       | 44.8                          | 49.4                                | 12                | 1066                   |
| 1 month            | 21.9                          | 38.6                                | 2                 | 332                    |
| 6 weeks            | 27.2                          | 38.2                                | 3                 | 180                    |
| 3 months           | 18.2                          | 25.6                                | 4                 | 432                    |
| 6 months           | 17.1                          | 22.1                                | 6                 | 524                    |
| 12 months          | 16.4                          | 20.9                                | 8                 | 611                    |
| 24 months          | 17.3                          | 22.8                                | 6                 | 418                    |

Sensitivity analysis

| Follow-up interval | N weighted pooled mean | Number of studies | Number of participants |
|--------------------|------------------------|-------------------|------------------------|
| Preoperative       | 44.8                   | 20                | 1373                   |
| 1 month            | 29.3                   | 4                 | 407                    |
| 6 weeks            | 26.4                   | 4                 | 200                    |
| 3 months           | 21.3                   | 11                | 576                    |
| 6 months           | 18.3                   | 9                 | 692                    |
| 12 months          | 18.7                   | 15                | 1015                   |
| 18 months          | 9.1                    | 1                 | 83                     |
| 24 months          | 14.6                   | 10                | 603                    |
| 36 months          | 5.2                    | 1                 | 98                     |
| 42 months          | 30                     | 1                 | 30                     |
| 48 months          | 24.6                   | 1                 | 52                     |

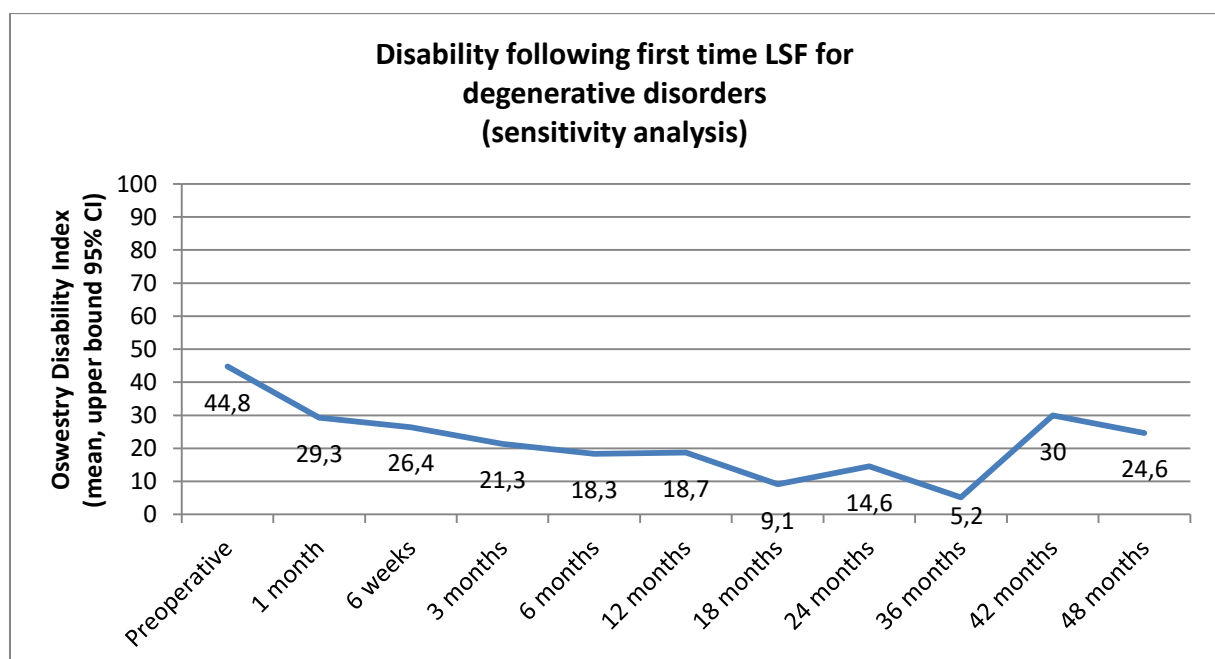

**Article name:** Pain and disability after first-time spinal fusion for lumbar degenerative disorders: a systematic review and meta-analysis

**Journal name:** European Spine Journal

**Author names:** Niek Koenders, Alison Rushton, Martin L. Verra, Paul C. Willems, Thomas J. Hoogeboom, J. Bart Staal.

**Corresponding author:** Niek Koenders, [niek.koenders@radboudumc.nl](mailto:niek.koenders@radboudumc.nl)
